# Supplementary material for: Surface engineered amphiphilic carbon dots: solvatochromic behavior and applicability as a molecular probe
Source: Royal Society of Chemistry journal article supplement (doi:10.1039/d0tb02007a), 2020-12-30
Supplement: d0tb02007a1.pdf [file d0tb02007a1.pdf]

## Supporting Information

### Surface Engineered Core-Shell Amphiphilic Carbon-dots: Solvatochromic Behavior and Applicability as Molecular Probe

*Subrata Pandit, Sudipta Mondal and Mrinmoy De*

*Department of Organic Chemistry, Indian Institute of Science, Bangalore-560094, India*

*e-mail: md@iisc.ac.in*

|                                                                                                                                      |    |
|--------------------------------------------------------------------------------------------------------------------------------------|----|
| <b>Figure S1.</b> Transmission Electron Microscopy (TEM) image of <i>m</i> -phenylenediamine mediated C-Dots.....                    | 2  |
| <b>Figure S2.</b> UV-Vis spectra of <i>o</i> -phenylenediamine mediated C-Dots in series of solvent.....                             | 2  |
| <b>Figure S3.</b> Nuclear Magnetic Resonance (NMR) of <i>o</i> -phenylenediamine mediated AC-Dots.....                               | 3  |
| <b>Figure S4.</b> Powder X-ray diffraction (a) and Raman spectroscopy (b) of AC-Dots. ( <i>o</i> -isomer).                           |    |
| <b>Figure S5.</b> Solvent dependent fluorescence study of <i>o</i> -phenylenediamine with citric acid mediated C-Dots (AC-Dots)..... | 4  |
| <b>Figure S6.</b> Fluorescence study of control only citric acid C-Dots.....                                                         | 5  |
| <b>Figure S7.</b> Salt and pH stability study of AC-Dots.....                                                                        | 5  |
| <b>Figure S8.</b> Protein titration plot of BSA, Lipase and Xylanase with AC-Dots.....                                               | 6  |
| <b>Figure S9.</b> Protein titration plot of $\alpha$ -ChT, Pepsin, lysozyme $\beta$ -glucanase and Trypsin with AC-Dots.....         | 7  |
| <b>Figure S10.</b> Protein titration plot of Cyto-C, $\beta$ -galactosidase with AC-Dots.....                                        | 8  |
| <b>Figure S11.</b> Blue shift in fluorescence spectra of AC-Dots in presence of BSA and Lipase.....                                  | 8  |
| <b>Figure S12.</b> Red shift in fluorescence spectra of AC-Dots in presence of $\alpha$ -ChT and Trypsin....                         | 9  |
| <b>Table S1:</b> Binding constant determination of proteins with AC-Dots using fluorescence spectroscopy.....                        | 9  |
| <b>Table S2.</b> Temperature dependent fluorescence study of proteins with AC-Dots.....                                              | 9  |
| <b>Figure S13.</b> Circular Dichroism study of different protein with AC-Dots.....                                                   | 10 |

## TEM images:

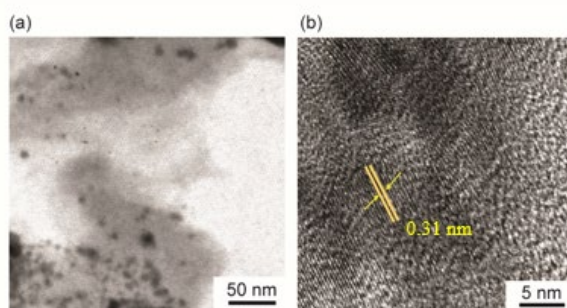

**Figure S1.** Transmission Electron Microscopy (TEM) image of *m*-phenylenediamine mediated C-Dots (a); high resolution TEM (b).

## UV-Vis Spectroscopy:

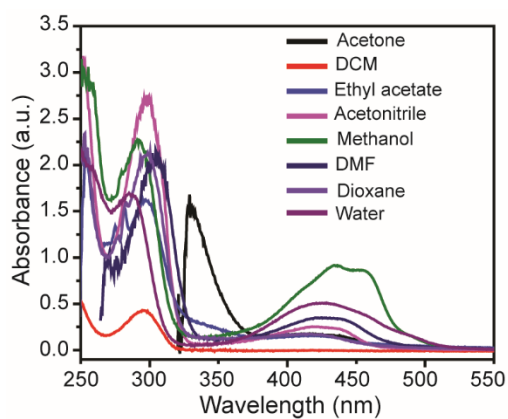

**Figure S2.** UV-Vis spectroscopy of *o*-phenylenediamine mediated C-Dots in a series of solvents.

## NMR Spectra of AC-Dots:

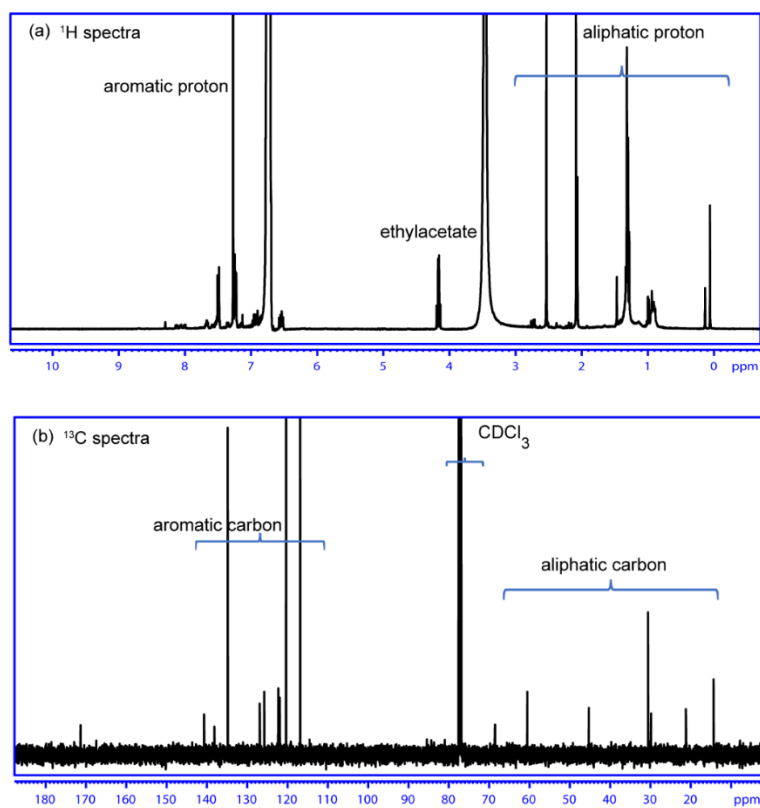

**Figure S3.** Nuclear Magnetic Resonance (NMR) spectra of AC-Dots,  $^1\text{H}$  spectra (a) and  $^{13}\text{C}$  spectra (b) in  $\text{CDCl}_3$  solvent.

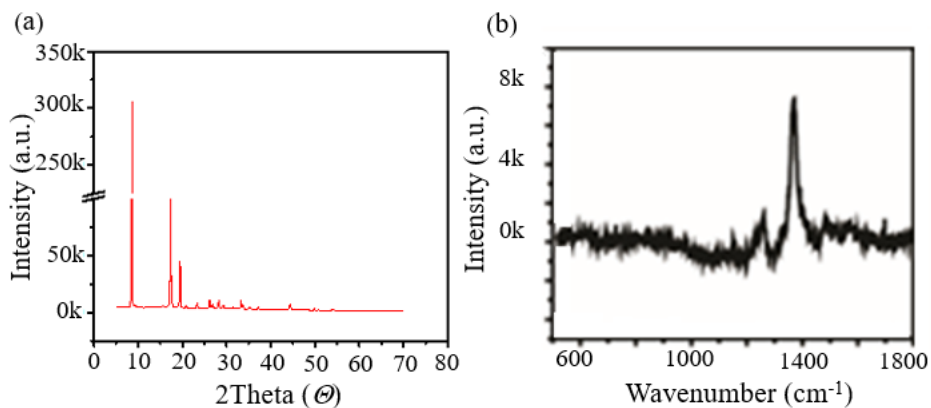

**Figure S4.** Powder X-ray diffraction (a) and Raman spectroscopy (b) of AC-Dots. (*o*-isomer).

## Solvent dependent fluorescence study of *o*-phenylenediamine with citric acid mediated C-Dots (AC-Dots):

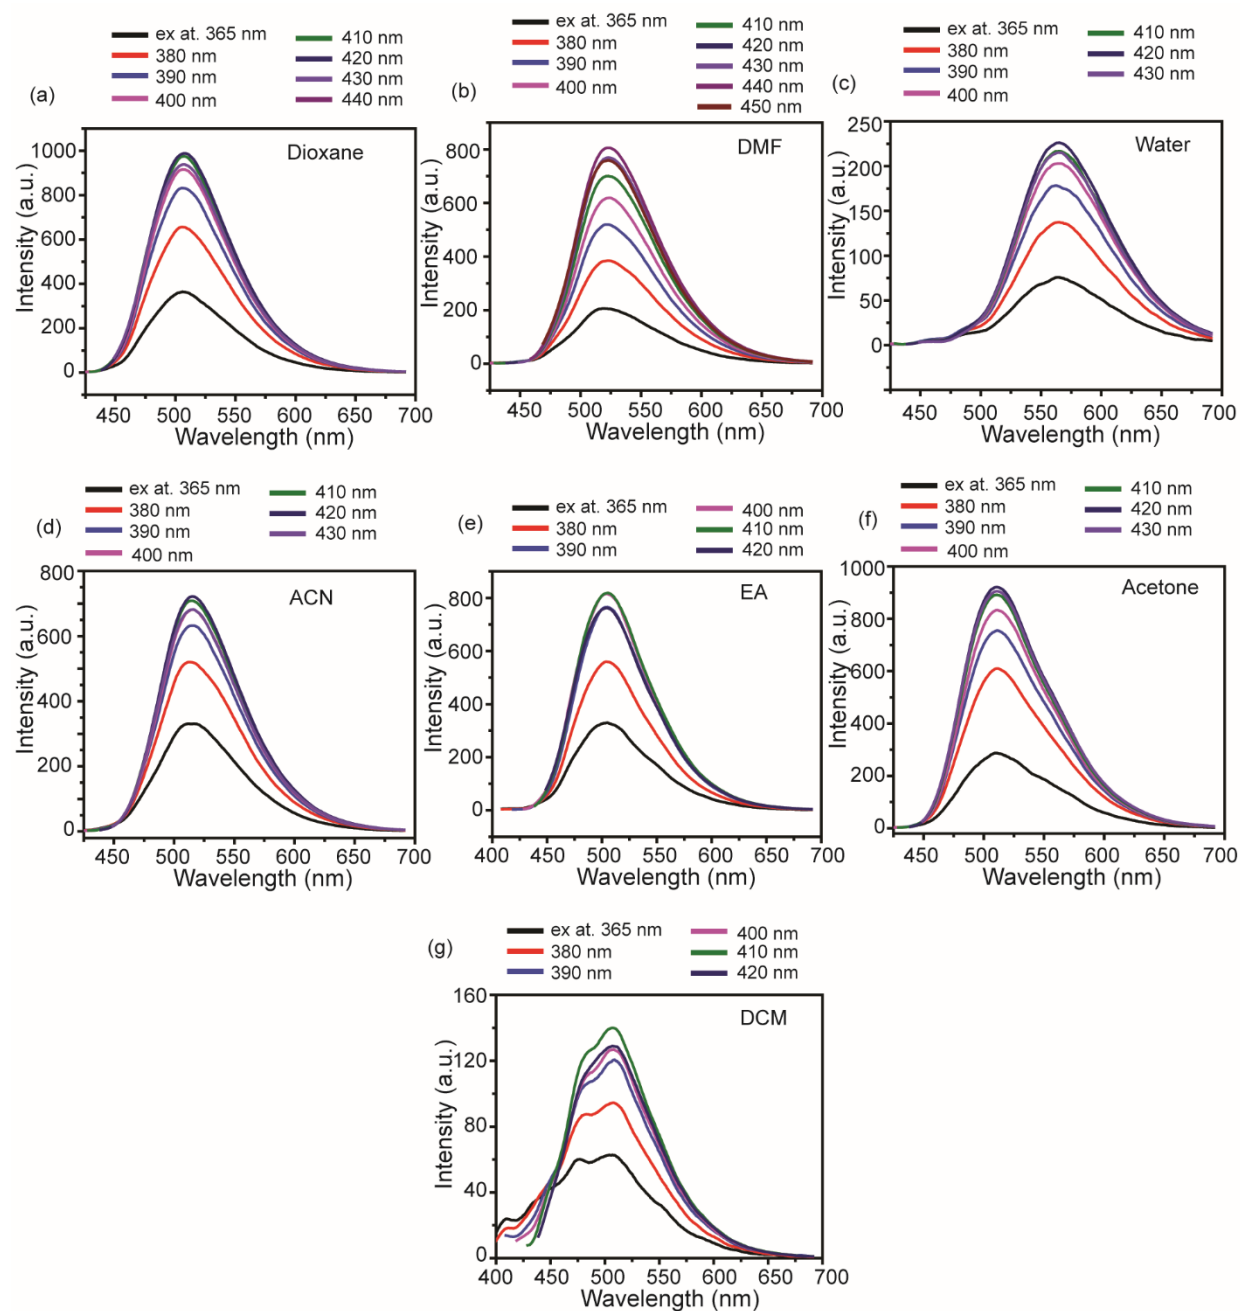

**Figure S5.** Solvatochromism study of *o*-phenylenediamine with citric acid mediated C-Dots (AC-Dots) in different solvents, Dioxane (a); DMF (b); water (c); acetonitrile (d); ethyl acetate (EA) (e); acetone (f) and DCM (g).

## Fluorescence study of only Citric acid mediated C-Dots.

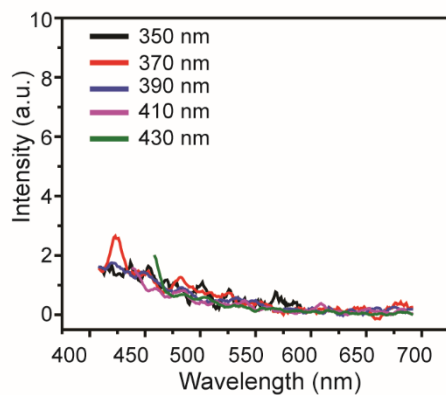

**Figure S6.** Fluorescence study of only citric acid C-Dots in 5mM PBs at pH 7.4.

## pH and Salt study:

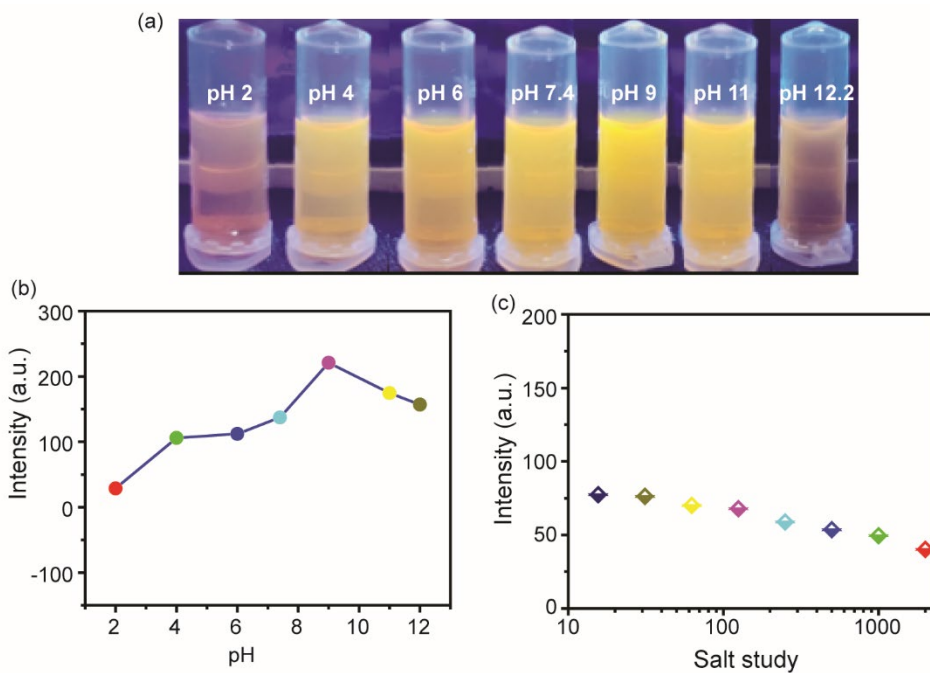

**Figure S7.** Stability image of AC-Dots (a) in presence different pH (b) and various salt concentration (c).

## Protein titration plot.

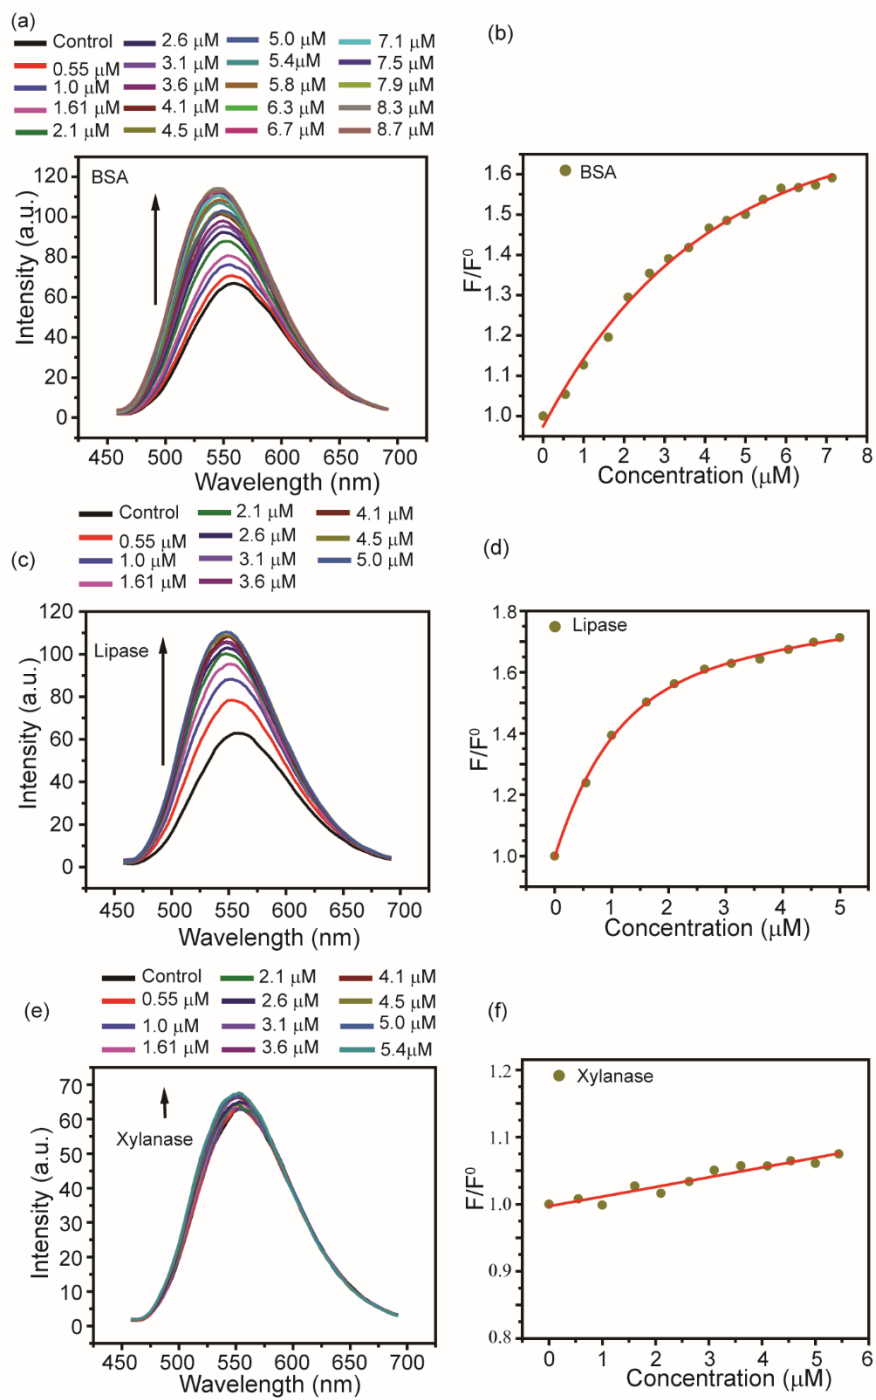

**Figure S8.** Protein titration plot of BSA, lipase and xylanase (a) and (c) with AC-Dots and curve fitting plot of (b) and (d) of respective protein in 5 mM PBs pH at 7.4.

## Protein titration plot.

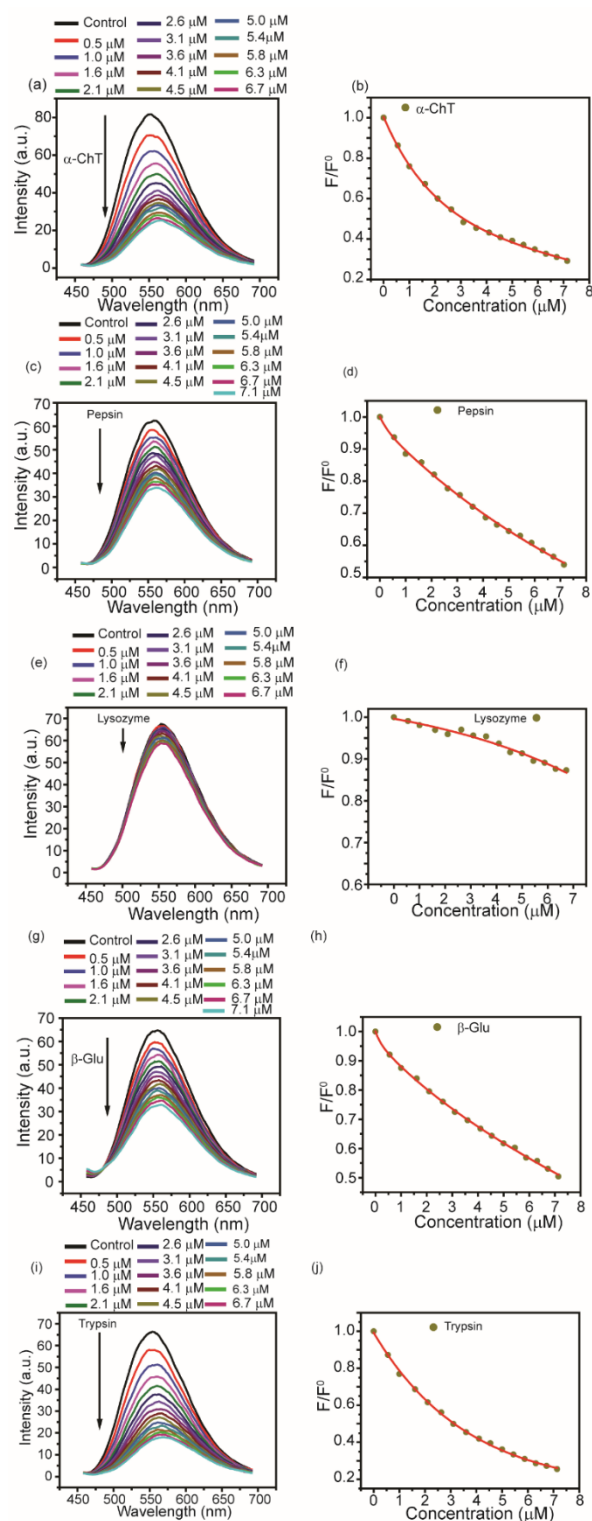

**Figure S9.** Protein titration plot of  $\alpha$ -Chymotripsin pepsin, lysozyme,  $\beta$ -glucanase and trypsin (a), (c), (e) and (g) with AC-Dots and curve fitting plot of (b), (d), (f) and (h) of respective protein in 5 mM PBs pH at 7.4.

## Protein titration plot.

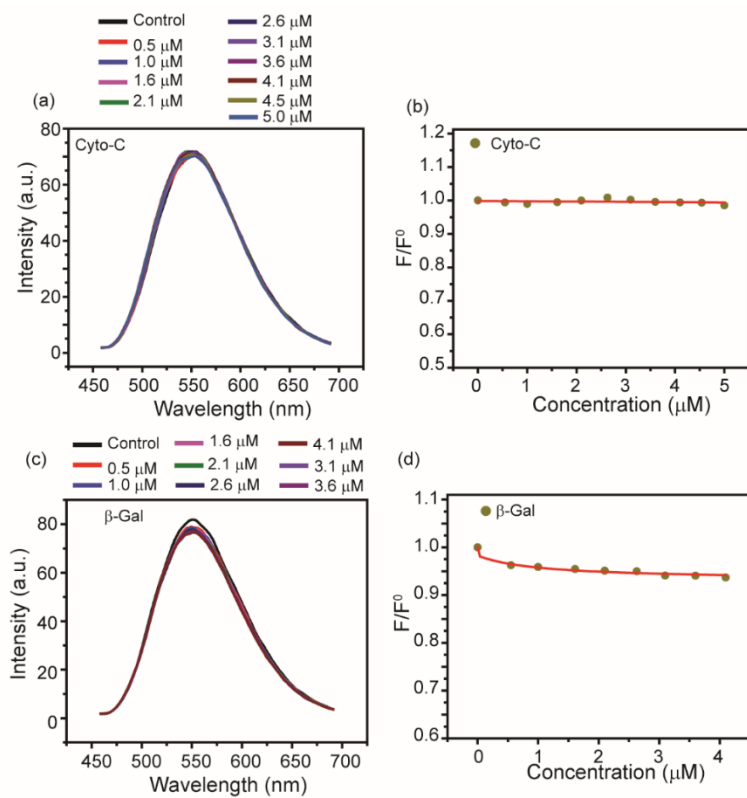

**Figure S10.** Protein titration plot of Cytochrome-C (a) and  $\beta$ -galactosidase (b) with AC-Dots and curve fitting plot of same protein (c, d) respectively in 5 mM PBs pH at 7.4.

## Blue shift in fluorescence spectre of AC-Dots.

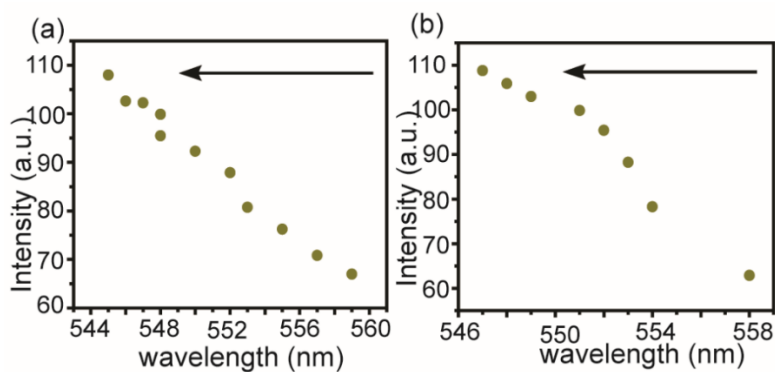

**Figure S11.** Blue shift in fluorescence spectre of AC-Dots in presence of BSA (a) and Lipase (b) in sodium phosphate buffer pH 7.4.



### Red shift in fluorescence spectre of AC-Dots.

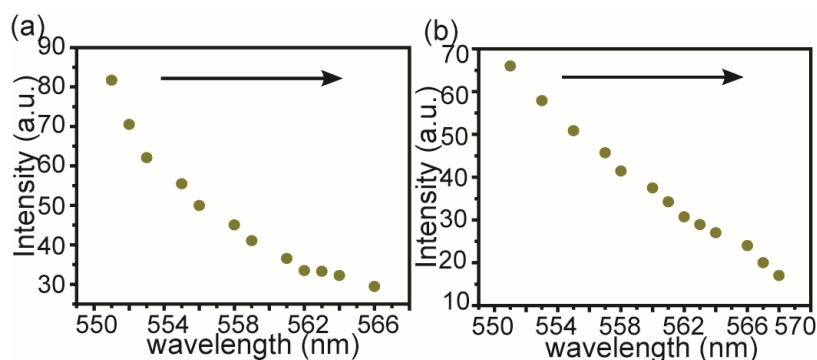

**Figure S12.** Red shift in fluorescence spectre of AC-Dots in presence of  $\alpha$ -ChT (a) and Trypsin (b) in sodium phosphate buffer pH 7.4.

**Table S1:** Binding constant determination of proteins with AC-Dots using fluorescence spectroscopy.

| Name of proteins       | Binding constant ( $\times 10^4$ mol $^{-1}$ ) | Name of proteins | Binding constant ( $\times 10^4$ mol $^{-1}$ ) |
|------------------------|------------------------------------------------|------------------|------------------------------------------------|
| Bovine serum           | 10.2 $\pm$ 0.420                               | Lysozyme         | 1.9 $\pm$ 0.072                                |
| $\beta$ -Glucanase     | 12.57 $\pm$ 0.150                              | Pepsin           | 11.09 $\pm$ 0.120                              |
| $\beta$ -Galactosidase | 2.01 $\pm$ 0.201                               | Ribonuclease     | 3.36 $\pm$ 0.091                               |
| $\alpha$ -Chymotrypsin | 32.1 $\pm$ 0.310                               | Trypsin          | 33.67 $\pm$ 0.900                              |
| Cytochrome-C           | 0.1 $\pm$ 0.006                                | Xylanase         | 1.3 $\pm$ 0.068                                |
| Lipase                 | 20.3 $\pm$ 2.100                               | -                | -                                              |

**Table S2:** Temperature dependent fluorescence study of proteins with AC-Dots.

| Temperature | BSA (binding constant) $\times 10^4$ mol $^{-1}$ | $\alpha$ -ChT (binding constant) $\times 10^4$ mol $^{-1}$ |
|-------------|--------------------------------------------------|------------------------------------------------------------|
| 298 k       | 43.2 $\pm$ 0.08                                  | 31.9 $\pm$ 0.601                                           |
| 310 k       | 12.97 $\pm$ 0.34                                 | 7.4 $\pm$ 0.40                                             |

### Circular Dichroism (CD) study of different proteins with AC-Dots.

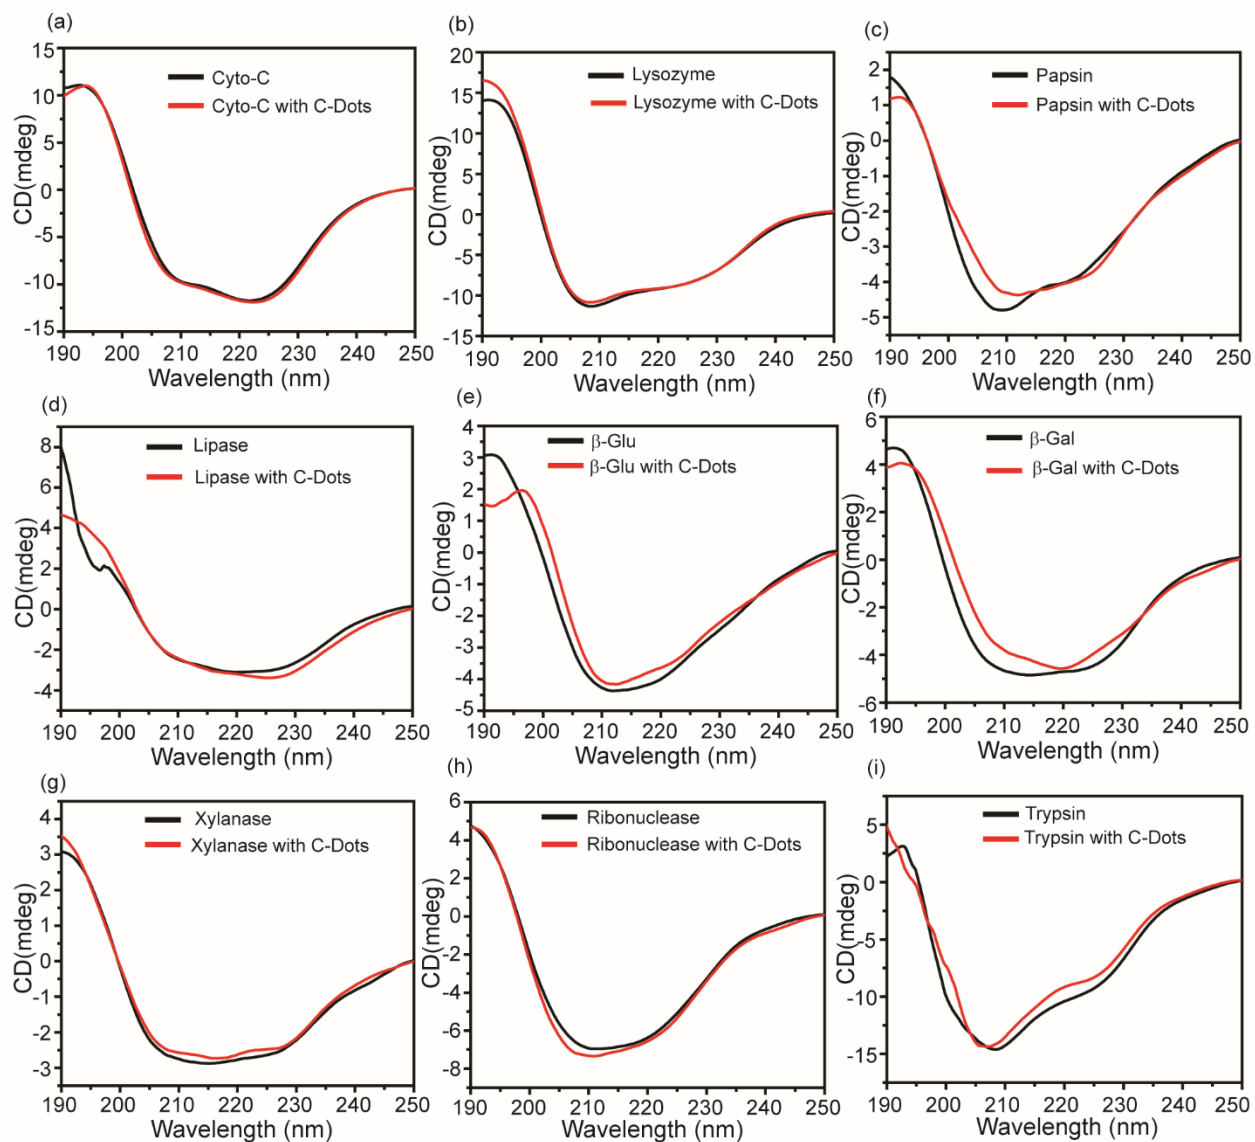

**Figure S13.** Circular Dichroism (CD) study of cyto-c (a); lysozyme (b); pepsin (c); lipase (d)  $\beta$ -glu (e);  $\beta$ -gal (f); xylanase (g); ribonuclease (h) and trypsin (i) with AC-Dots and native proteins in 5 mM PBs pH at 7.4.
